# Supplementary material
Source: PubMed Central journal article supplement (PMC6206882)

## SUPPLEMENTAL MATERIAL

Table I: Regression coefficients (with standard errors) on the individual and multivariable associations with the cube root infarct growth and cube root penumbra salvage with ordinal collateral score

| <i>Variable</i>                     | <b>Infarct growth</b><br>Estimate (SE) |                             | <b>Penumbra Salvage</b><br>Estimate (SE) |                             |
|-------------------------------------|----------------------------------------|-----------------------------|------------------------------------------|-----------------------------|
|                                     | <i>Individual effect</i>               | <i>Multivariable effect</i> | <i>Individual effect</i>                 | <i>Multivariable effect</i> |
| Age (per year)                      | 0.01 (0.01)                            | -0.001 (0.01)               | -0.002 (0.01)                            | -0.001 (0.01)               |
| Gender (female)                     | 0.70 (0.40)                            | 0.74 (0.42)                 | -0.12 (0.35)                             | -0.49 (0.39)                |
| NIHSS                               | 0.11 (0.02) *                          | 0.07 (0.03) *               | -0.04 (0.02)                             | -0.01 (0.03)                |
| Recanalization                      | 0.47 (0.45)                            | -0.01 (0.43)                | -0.28 (0.42)                             | -0.26 (0.53)                |
| Large vessel occlusion              | 1.21 (0.40) *                          | -0.15 (0.54)                | 0.51 (0.36)                              | 1.47 (0.50) *               |
| Collateral score (per point)        | -0.93 (0.19) *                         | -0.77 (0.26) *              | 0.50 (0.17) *                            | 1.04 (0.24) *               |
| Time from onset to baseline imaging | -0.07 (0.04)                           | -0.01 (0.05)                | 0.01 (0.04)                              | -0.01 (0.04)                |

\*p-value<0.05

Table II: Time from baseline to image added to the multivariable models

| <i>Variable</i>                      | <b>Infarct growth</b><br>Estimate (SE) | <b>Penumbra Salvage</b><br>Estimate (SE) |
|--------------------------------------|----------------------------------------|------------------------------------------|
|                                      | <i>Multivariable effect</i>            | <i>Multivariable effect</i>              |
| Age (per year)                       | 0.004 (0.01)                           | -0.001 (0.01)                            |
| Gender (female)                      | 0.80 (0.45)                            | -0.73 (0.43)                             |
| NIHSS                                | 0.08 (0.03) *                          | -0.01 (0.03)                             |
| Recanalization                       | -0.33 (0.45)                           | -0.14 (0.43)                             |
| Large vessel occlusion               | 0.04 (0.55)                            | 1.20 (0.53) *                            |
| Poor collateral score (poor vs good) | 1.29 (0.48) *                          | -1.68 (0.46) *                           |
| Time from onset to baseline imaging  | -0.01 (0.05)                           | -0.02 (0.05)                             |
| Time from baseline and final imaging | 0.01 (0.02)                            | -0.01 (0.02)                             |

\*p-value<0.05

Figure I: Diagnostic plots for infarct growth multivariable model

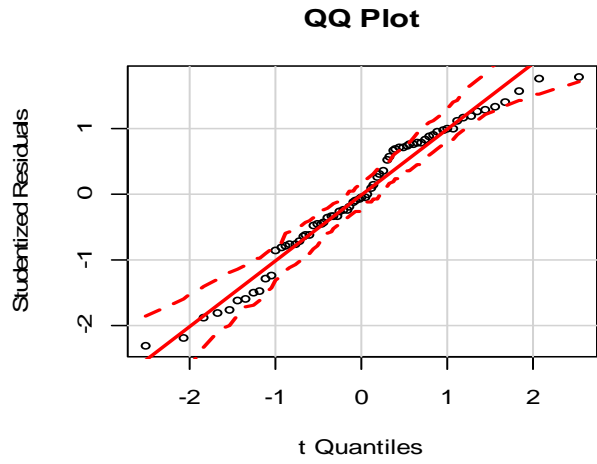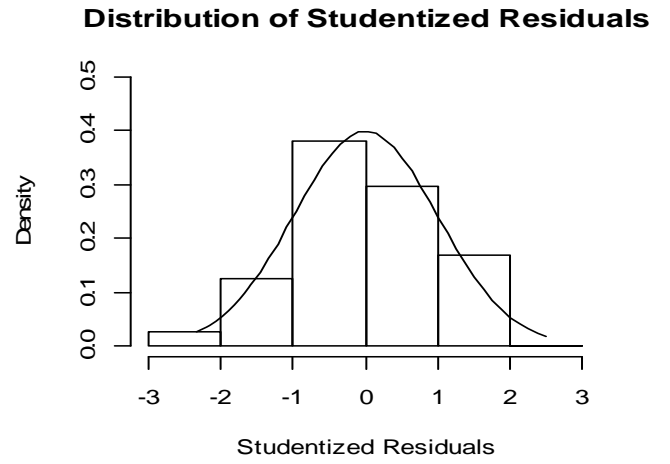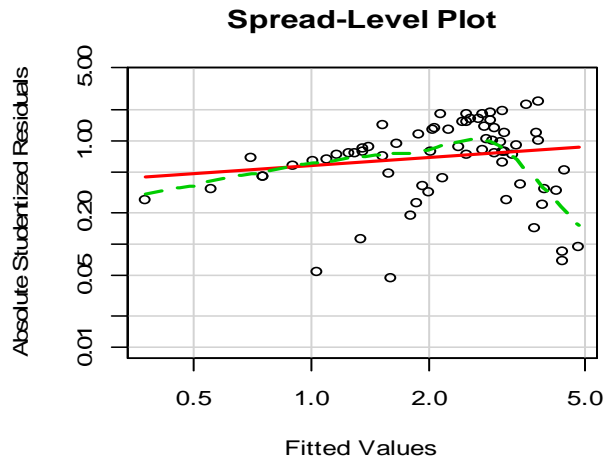

ltivariable model

Figure II: Diagnostic plots for penumbral salvage multivariable model

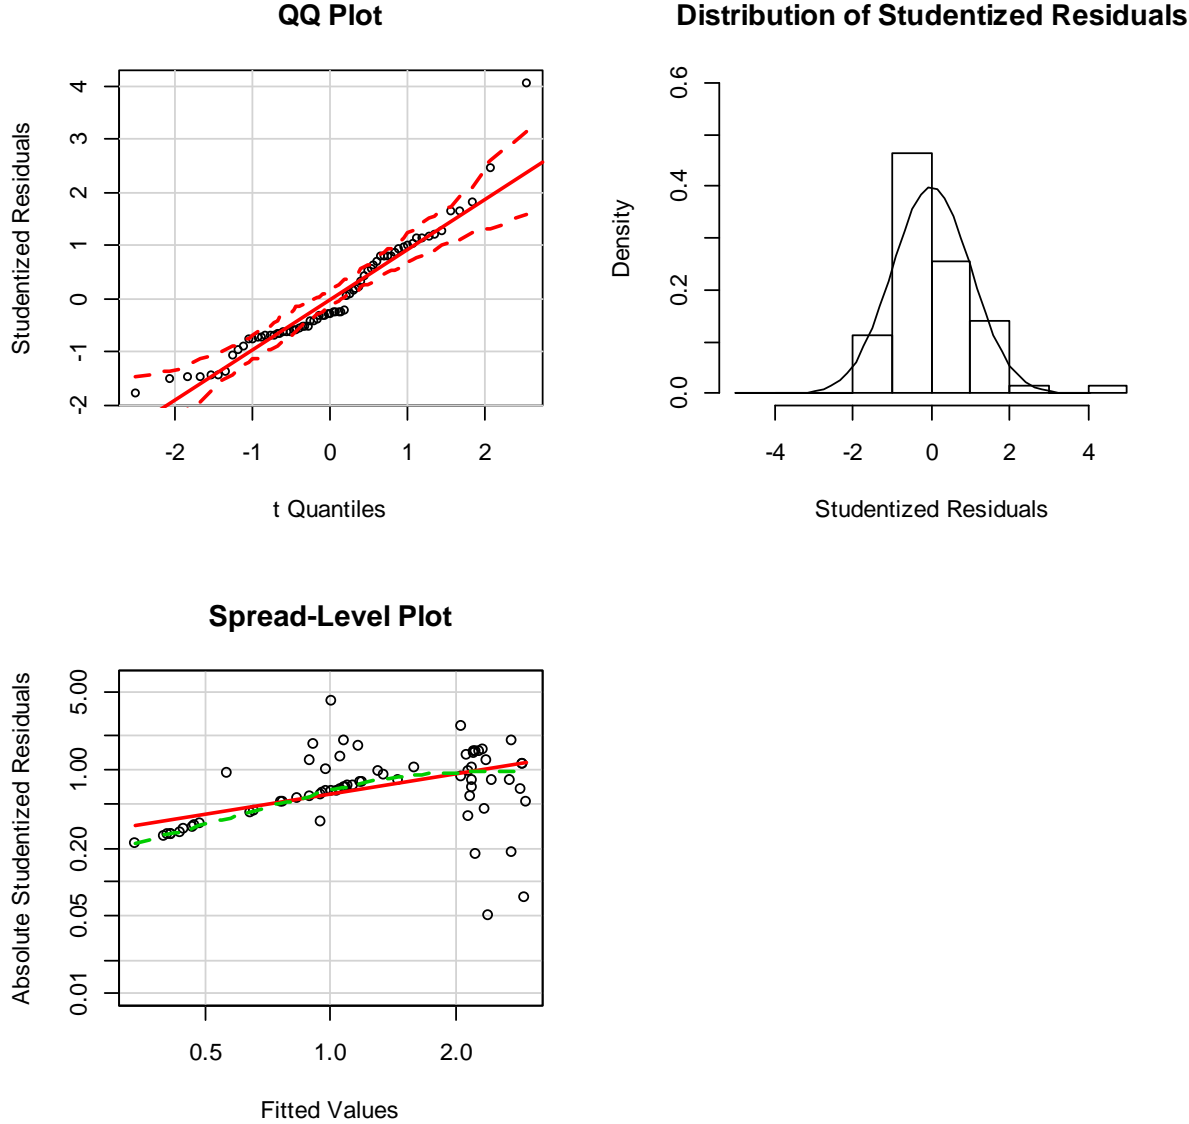

Figure III: Boxplot of infarct growth (Panel A) and penumbral salvage (Panel B) by collateral grade

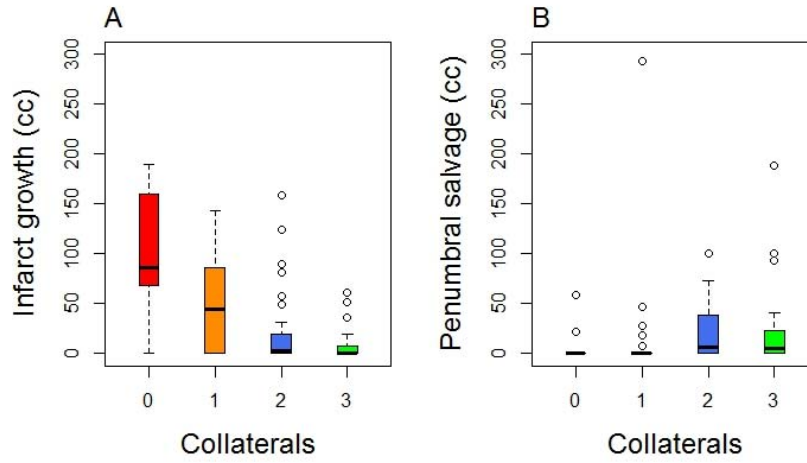

Figure IV: Collateral clock stratified by collateral grade incorporating individual subject data for infarct growth (Panel A) and penumbral salvage (Panel B)

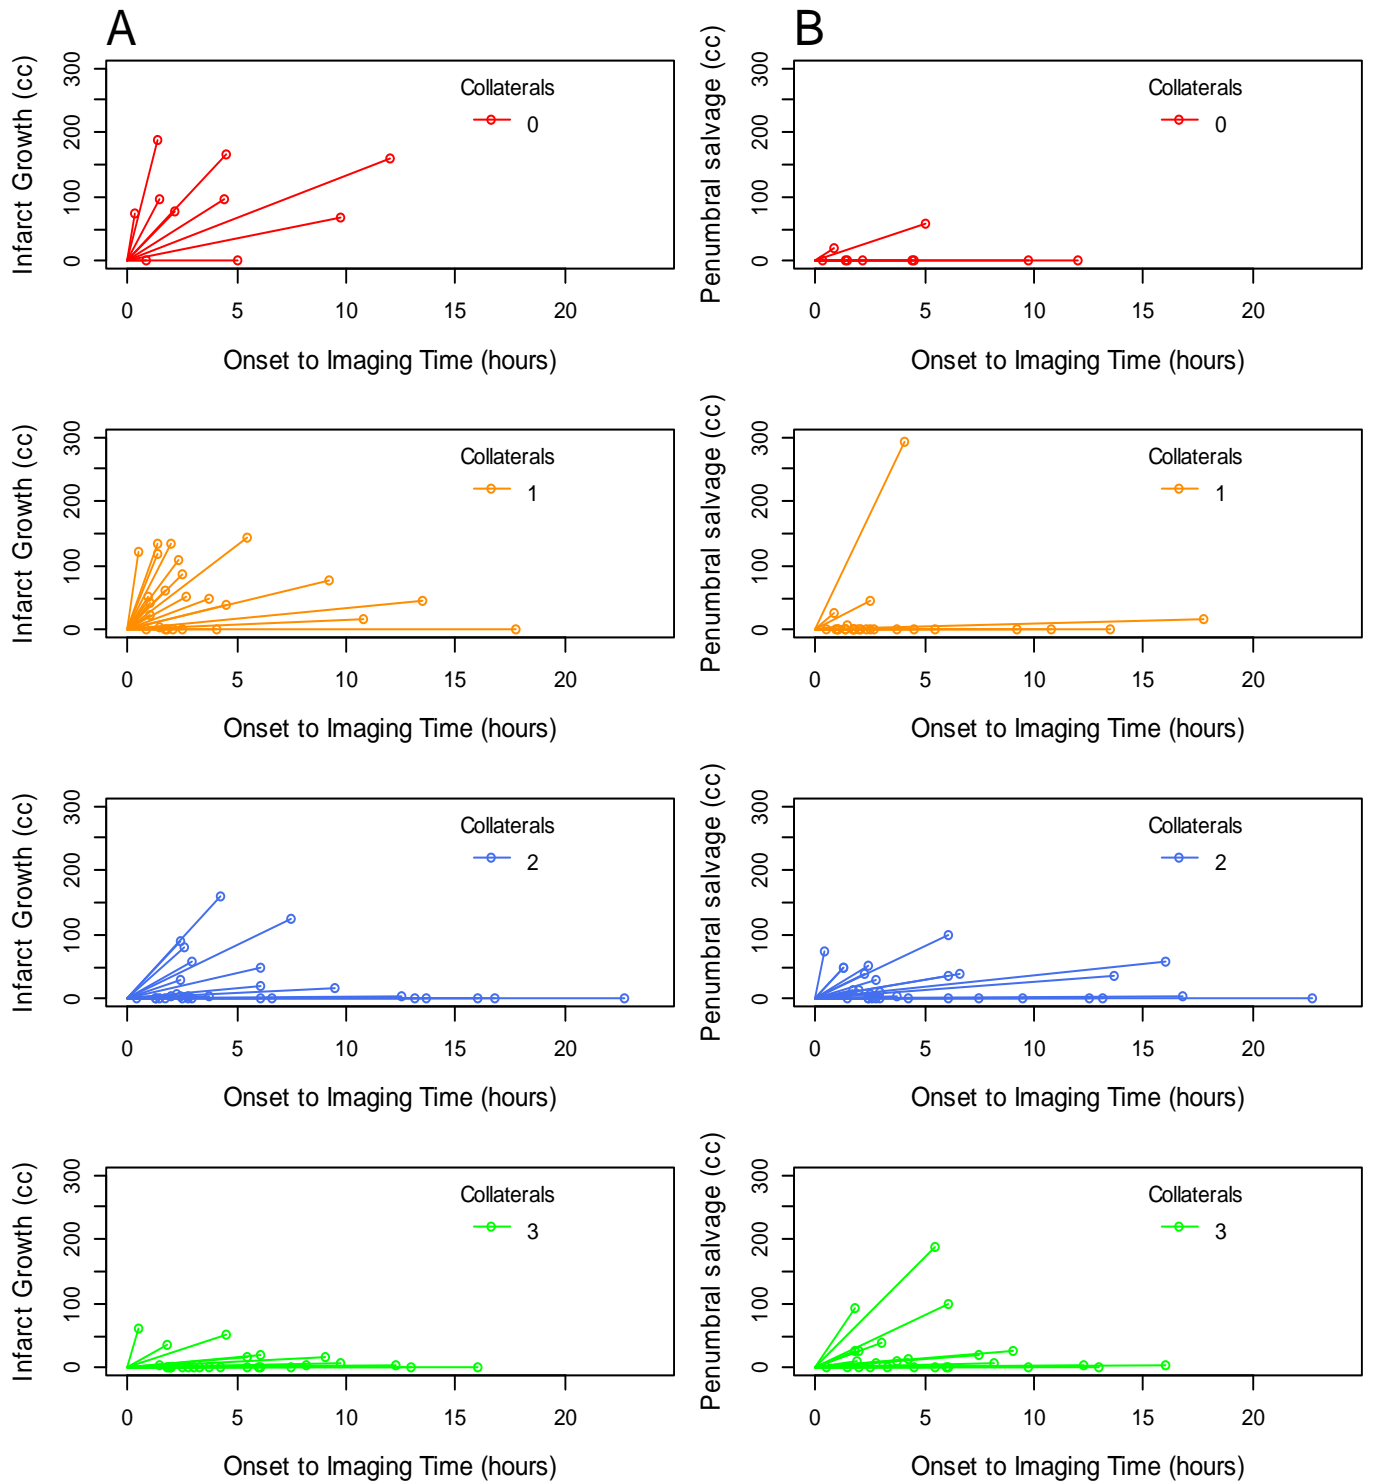

Supplement: NIHMS1500774-supplement-Supplemental_tables_and_figures.pdf [file NIHMS1500774-supplement-Supplemental_tables_and_figures.pdf]
